# Supplementary material for: Targeting MCL1-driven anti-apoptotic pathways overcomes blast progression after hypomethylating agent failure in chronic myelomonocytic leukemia
Source: PubMed Central journal article supplement — Cell Rep Med. 2024 May 22;5(6):101585. doi: 10.1016/j.xcrm.2024.101585 (PMC11228590; doi:10.1016/j.xcrm.2024.101585), 2024-05-22
Supplement: mmc1.pdf [file mmc1.pdf]

**Cell Reports Medicine, Volume 5**

**Supplemental information**

**Targeting MCL1-driven anti-apoptotic pathways  
overcomes blast progression after hypomethylating  
agent failure in chronic myelomonocytic leukemia**

**Guillermo Montalban-Bravo, Natthakan Thongon, Juan Jose Rodriguez-Sevilla, Feiyang Ma, Irene Ganan-Gomez, Hui Yang, Yi June Kim, Vera Adema, Bethany Wildeman, Tomoyuki Tanaka, Faezeh Darbaniyan, Gheath Al-Atrash, Karen Dwyer, Sanam Loghavi, Rashmi Kanagal-Shamanna, Xingzhi Song, Jianhua Zhang, Koichi Takahashi, Hagop Kantarjian, Guillermo Garcia-Manero, and Simona Colla**

A

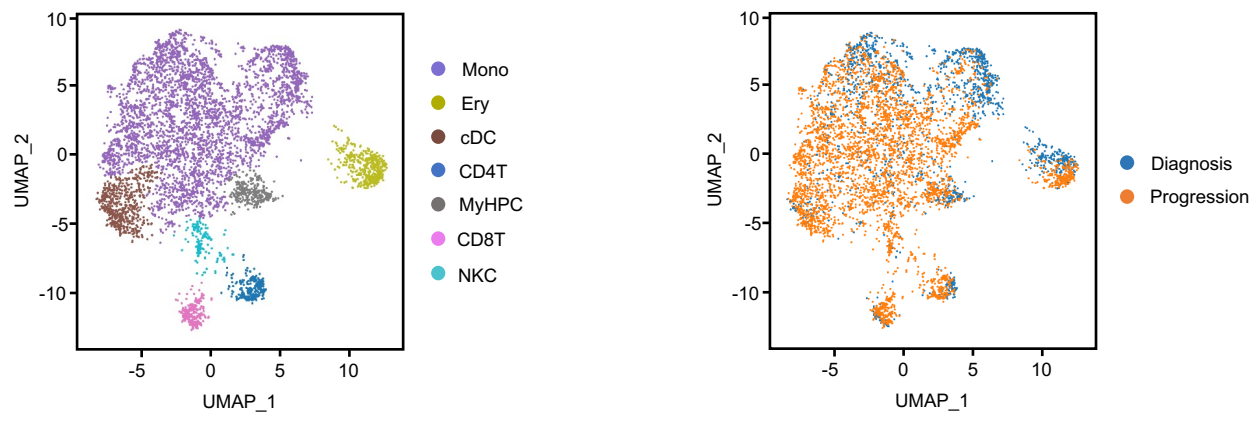

B

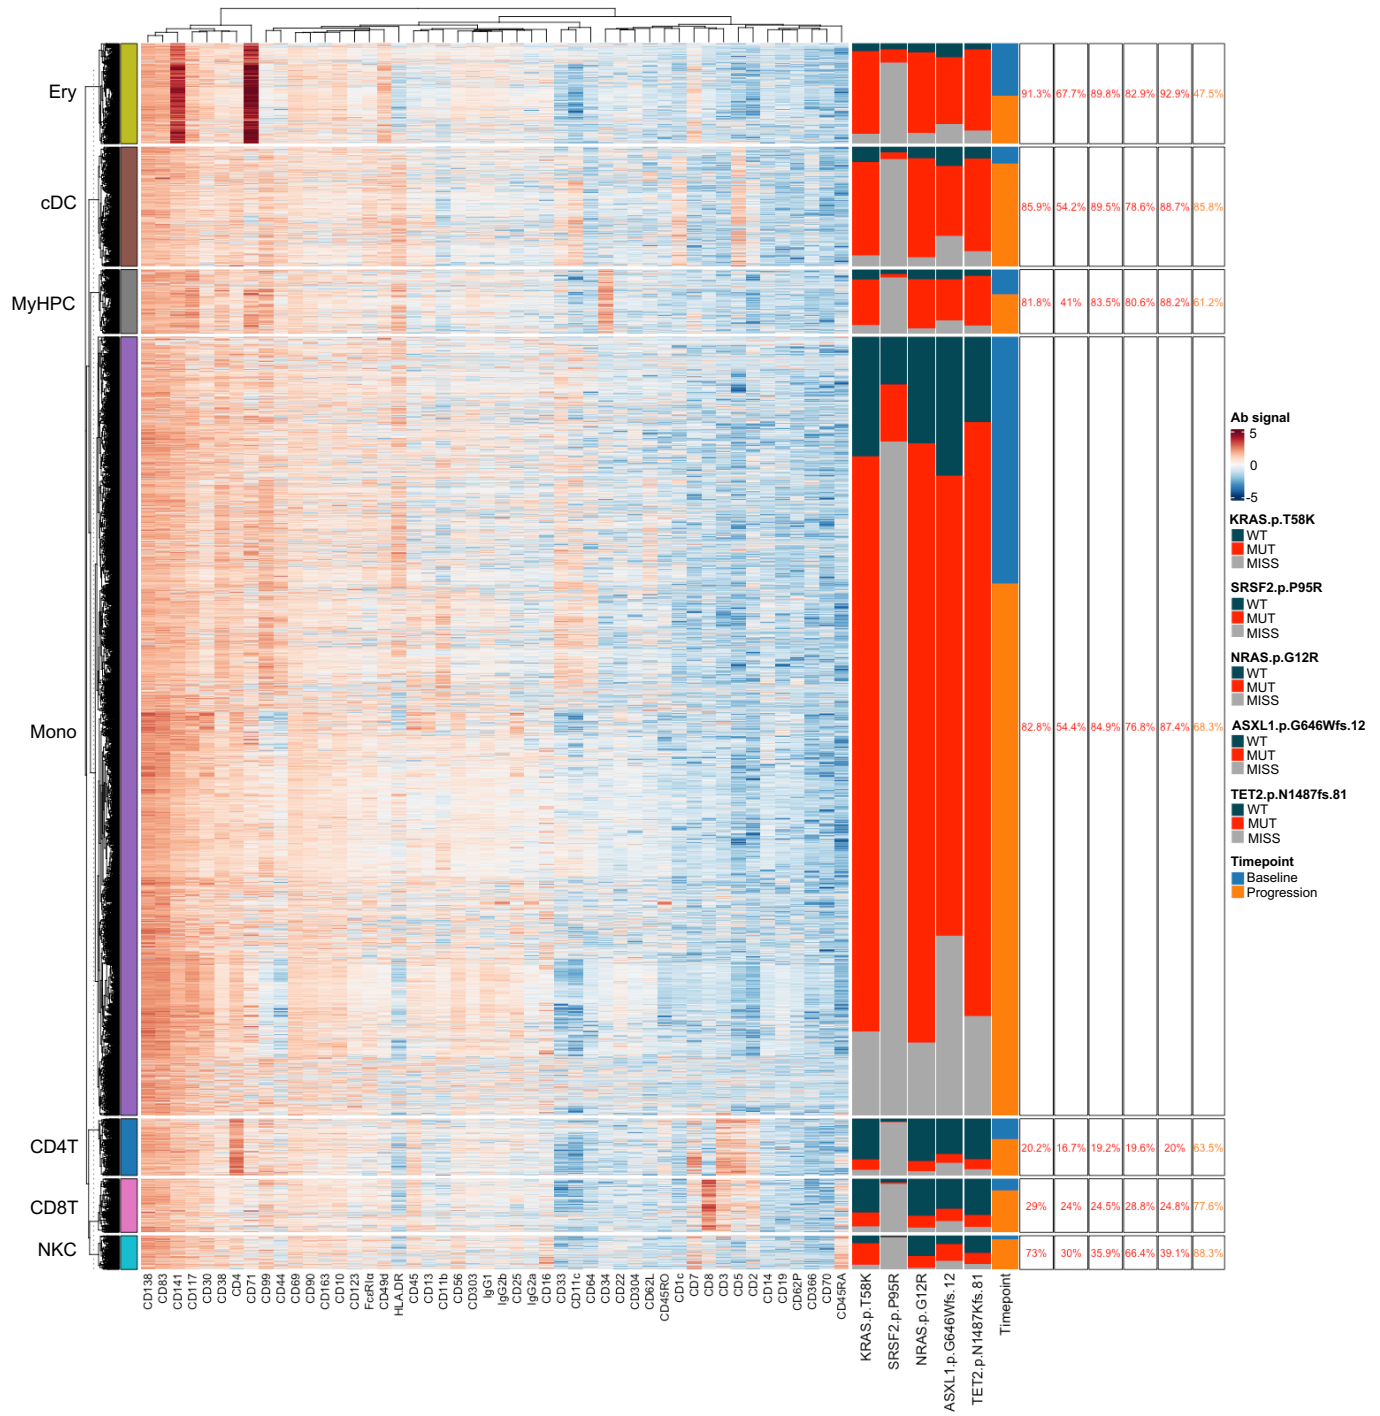

**Figure S1. Mutations in *RAS* pathway signaling genes predict a high risk of CMML BP after HMA therapy failure. Related to Figure 1.** (A) UMAP of scDNA and protein-seq data for pooled MNCs isolated from BM samples obtained from a CMML patient with pre-existing *KRAS*<sup>T58K</sup> and *NRAS*<sup>G12R</sup> mutations at diagnosis (n=1,826) and at BP after HMA therapy failure (n=4,001) included in the CMML patient cohort in Figure 1 and evaluated patient samples in Figure 4. BP was not associated with the clonal evolution of these mutations as they both had approximately 50% VAF at the onset of the disease. Each dot represents one cell. Cells are clustered based on immunophenotypic markers. Different colors represent cluster identity (left) or origin (right). Mono, monocytes; Ery, erythroid precursors; cDC, classical dendritic cells; CD4T, CD4<sup>+</sup> T cells; MyHPC, myeloid hematopoietic progenitor cells; CD8T, CD8<sup>+</sup> T cells; NKC, natural killer cells. (B) Heatmap displaying DNA and protein reads from each sequenced cell type shown in Fig. S1A. Colors for protein data correspond to antibody-oligonucleotide intensity signals. High protein expression is depicted in red, and low protein expression is depicted in blue. DNA colors correspond to the genotypes for each individual mutation per cell read (wild-type = dark grey, mutant = red, missing = light grey) based on cluster. Percentages correspond to the frequencies of mutant reads within each cluster for a given mutation.

A

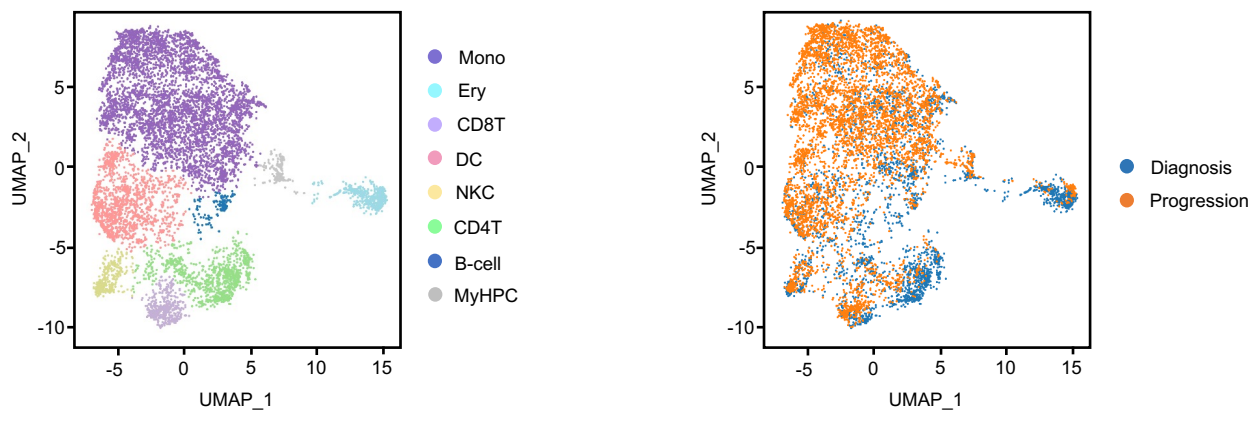

B

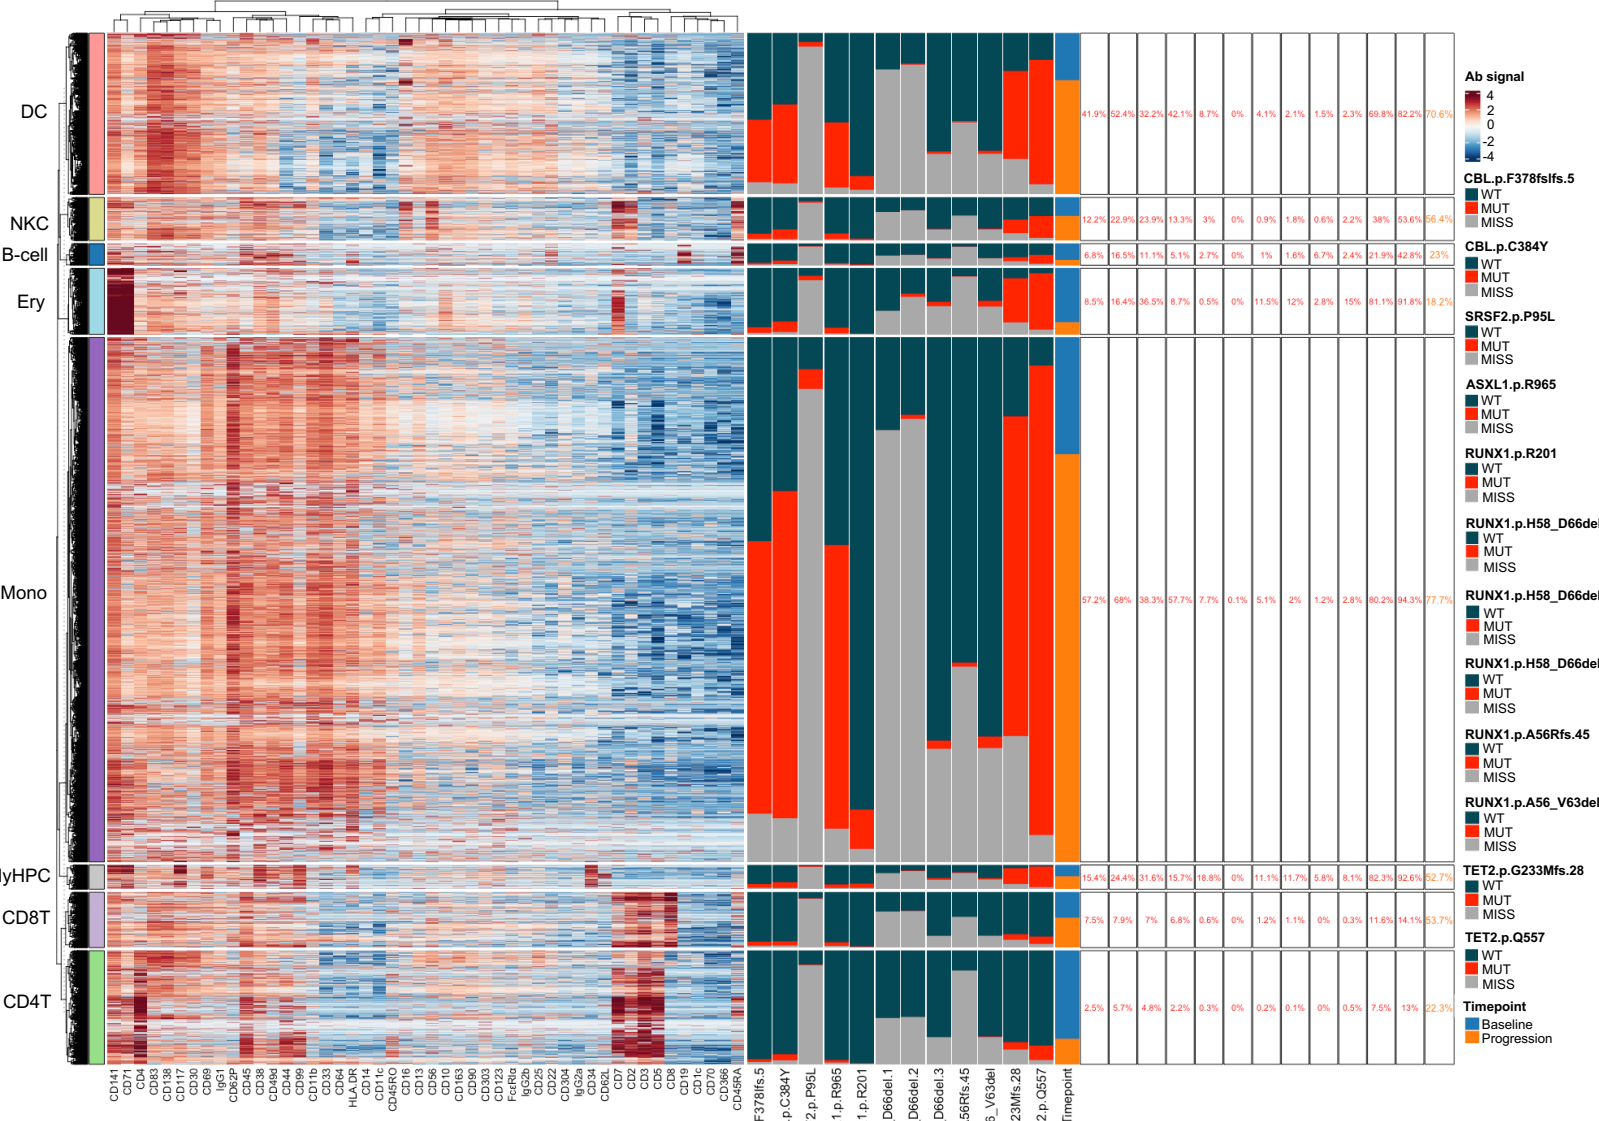

**Figure S2. *RAS* pathway mutant clones expand at BP after HMA therapy failure in CMML. Related to Figure 1. (A)** UMAP of scDNA and protein-seq data for pooled MNCs isolated from BM samples obtained from a CMML patient at diagnosis (n=3,213) and at BP after HMA therapy failure (n=5,342) included in the CMML patient cohort in Figure 1 and evaluated patient samples in Figure 4. BP was associated with the clonal evolution of a pre-existing *CBL*<sup>F378Ifs</sup> mutation and the acquisition of a previously undetected *CBL*<sup>C384Y</sup> mutation. Each dot represents one cell. Cells are clustered based on immunophenotypic markers. Different colors represent cluster identity (left) or origin (right). Mono, monocytes; Ery, erythroid precursors; CD8T, CD8<sup>+</sup> T cells; DC, classical dendritic cells; NKC, natural killer cells; CD4T, CD4<sup>+</sup> T cells; B cell, B lymphocytes, MyHPC; myeloid hematopoietic progenitor cells. **(B)** Heatmap displaying DNA and protein reads from each sequenced cell type as shown in Fig. S2A. Colors for protein data correspond to antibody-oligonucleotide intensity signals. Red indicates high protein expression, and blue indicates low protein expression. Colors for DNA data correspond to the genotype for each individual mutation per cell read (wild-type = dark grey, mutant = red, missing = light grey) based on cluster. Percentages correspond to the frequencies of mutant reads within each cluster for a given mutation.

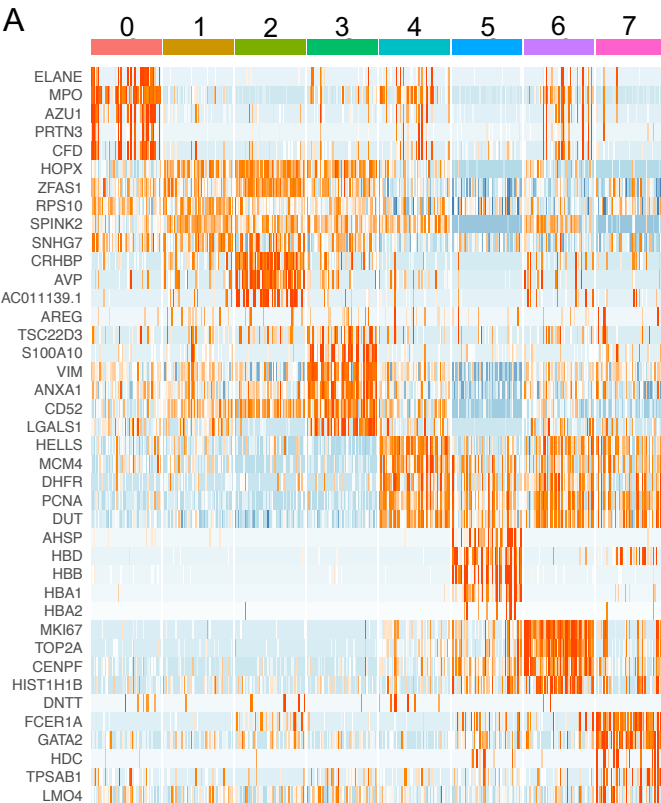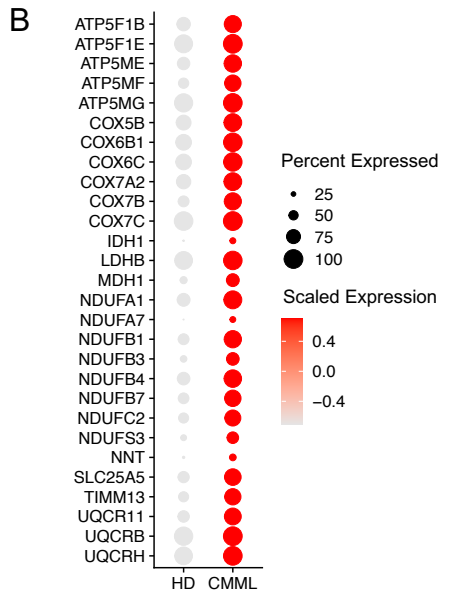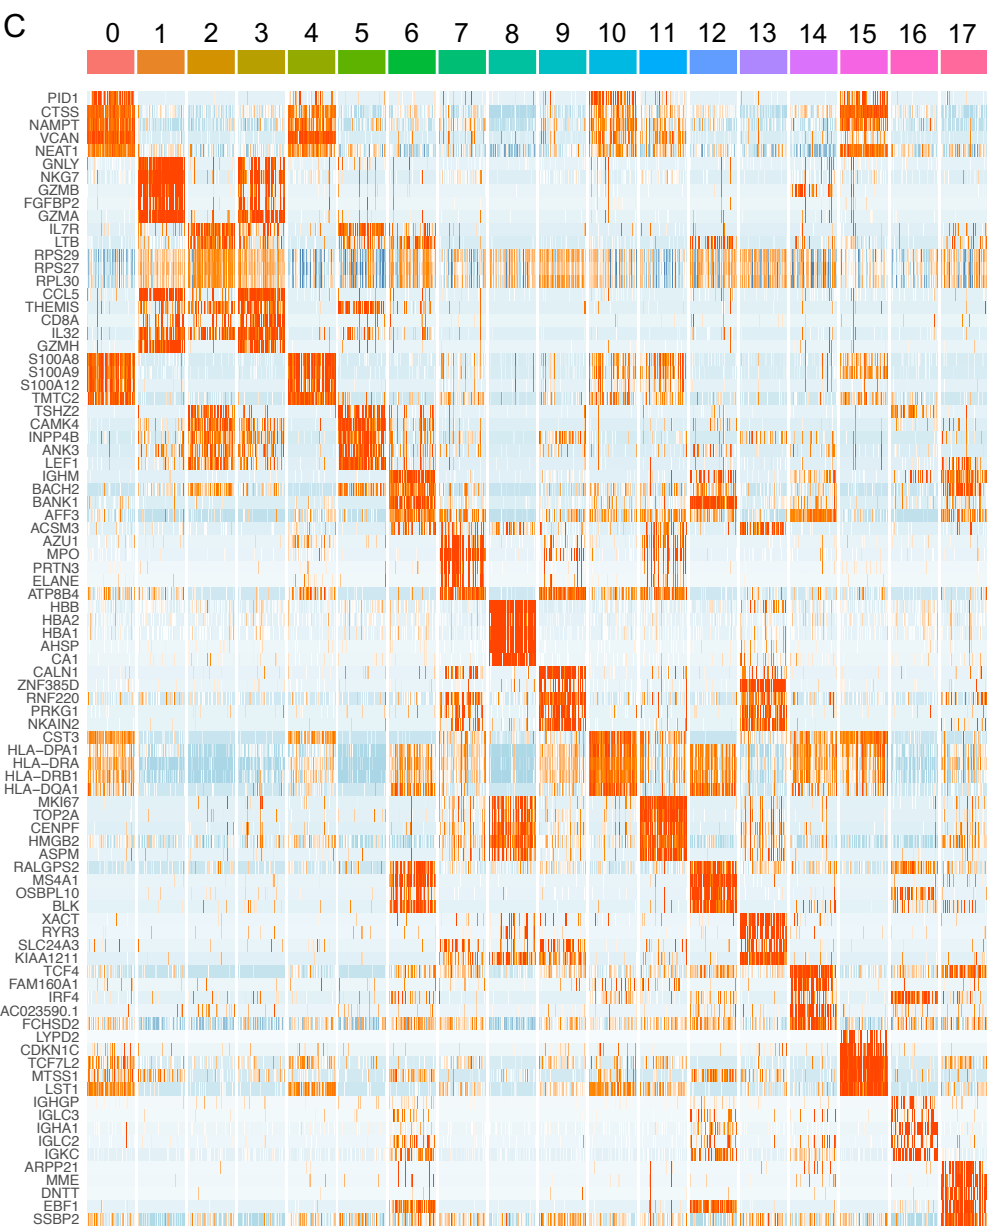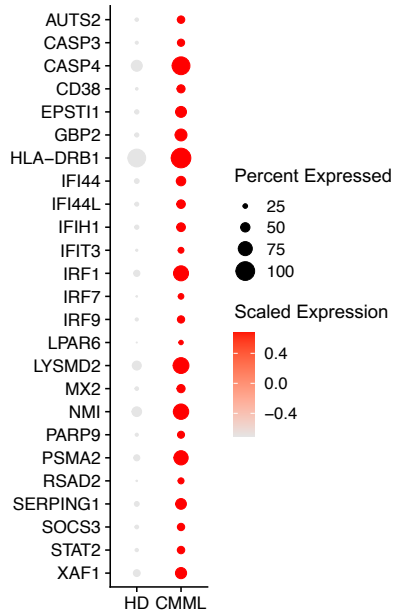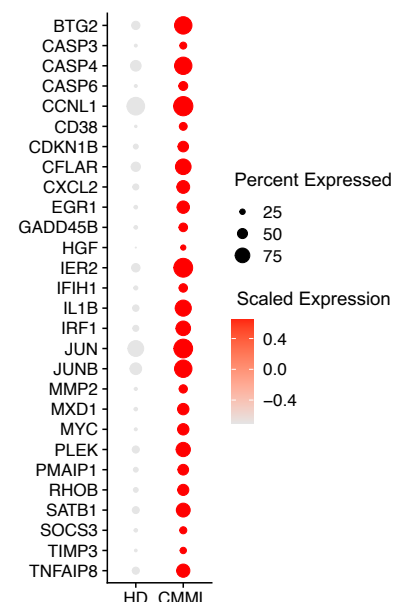

**Figure S3. *RAS* pathway mutated CMML cells activate cell-intrinsic and -extrinsic inflammatory networks. Related to Figure 2.** (A) Heatmap of the expression levels of the top 5 genes enriched in each of the 8 clusters shown in Fig. 2A. (B) Dot plots of the genes belonging to oxidative phosphorylation (top), IFN response (middle), and apoptosis (bottom) pathways that were significantly overexpressed in the CMML HSCs shown in Fig. 2A compared with those in HD HSCs. The scaled expression represents z scores across conditions. (C) Heatmap of the expression levels of the top 5 genes enriched in each of the 18 clusters shown in Fig. 2D.

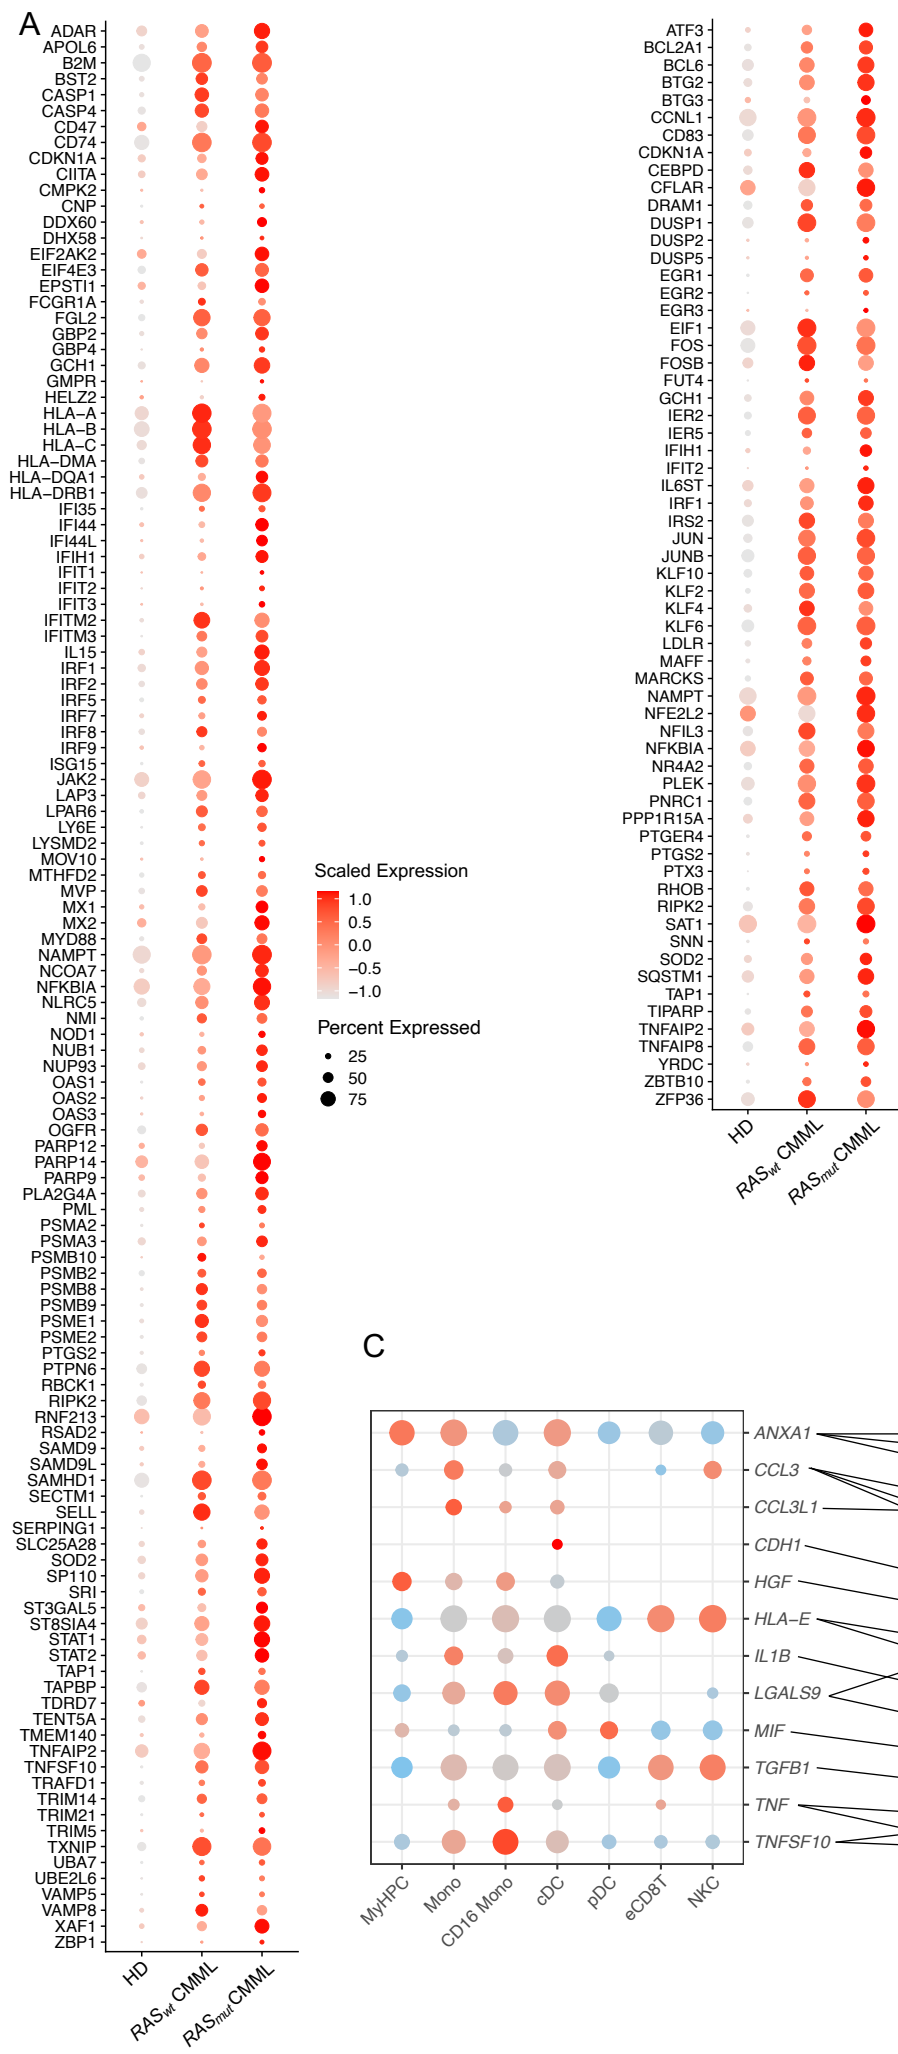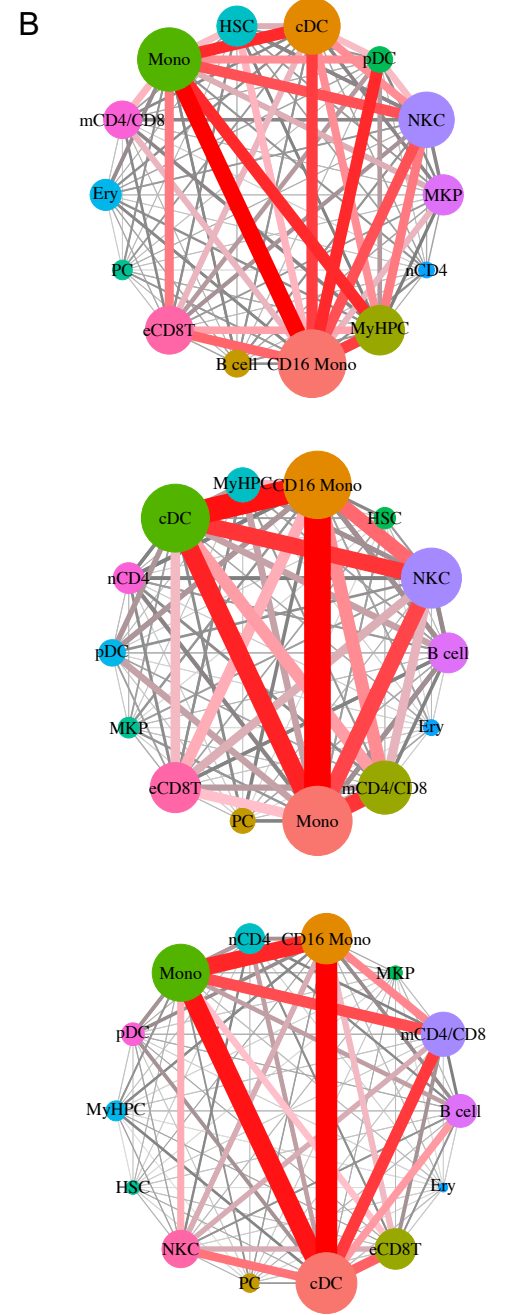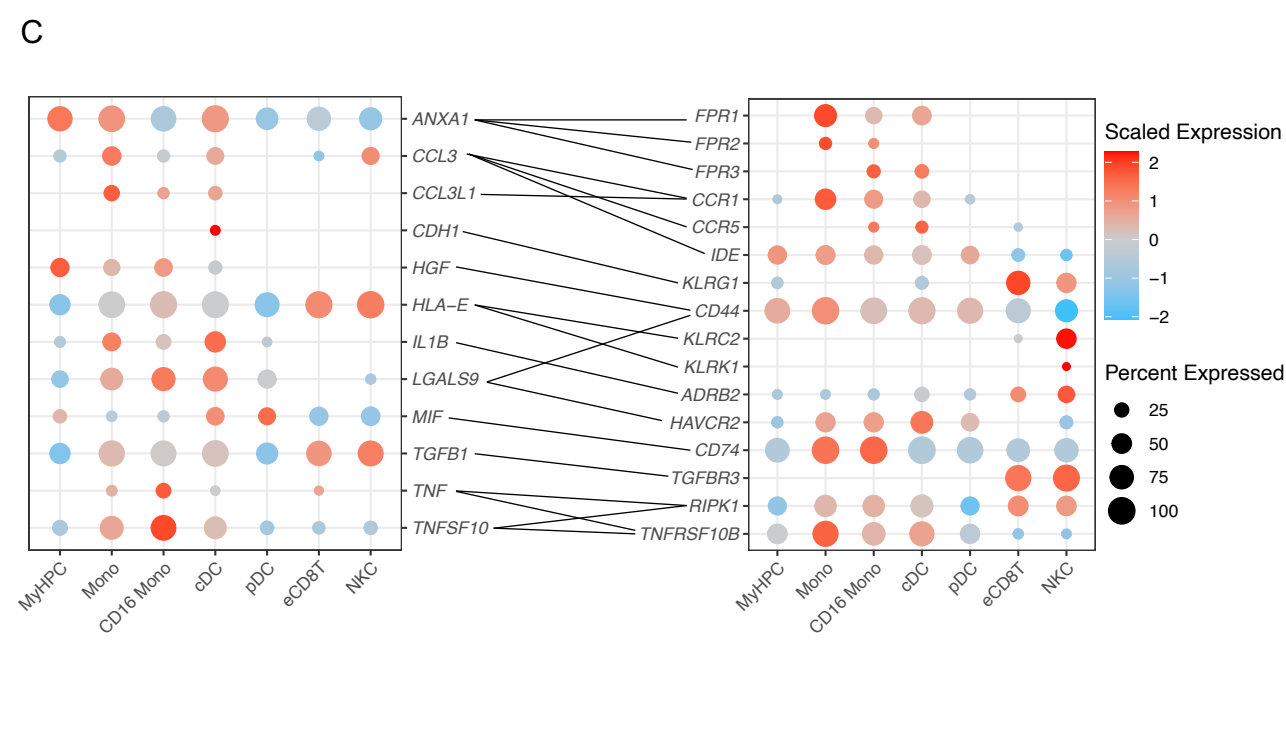



**Figure S4. *RAS* pathway mutated CMML cells activate inflammatory networks and establish inhibitory immune interactions.**  
**Related to Figure 2. (A)** Dot plots of the genes belonging to IFN response (left) and NF- $\kappa$ B signaling (right) pathways that were significantly overexpressed in *RAS* pathway mutant and/or wild-type CMML monocytes shown in Fig. 2D compared with those in HD monocytes. The scaled expression represents z scores across conditions. **(B)** Connectome web analysis of interactions between BM MNC populations that were significantly increased in *RAS* pathway wild-type (top) or mutant (middle) CMML compared to those of HDs, or in *RAS* pathway mutant CMML compared to *RAS* pathway wild-type CMML (bottom). The vertex (i.e., colored cell node) size is proportional to the number of interactions to and from each cell type, and the thickness of each connecting line is proportional to the number of interactions between 2 nodes. **(C)** Dot plots showing the most significant ligand- (left) to-receptor (right) interactions gained in MNCs from *RAS* pathway mutant CMML patients compared with those from *RAS* pathway wild-type CMML. Lines represent connections between ligands and their corresponding receptors. Color saturation indicates the level of gene expression. Dot size indicates the percentage of each cell type expressing the gene. The scaled expression represents z scores across conditions.

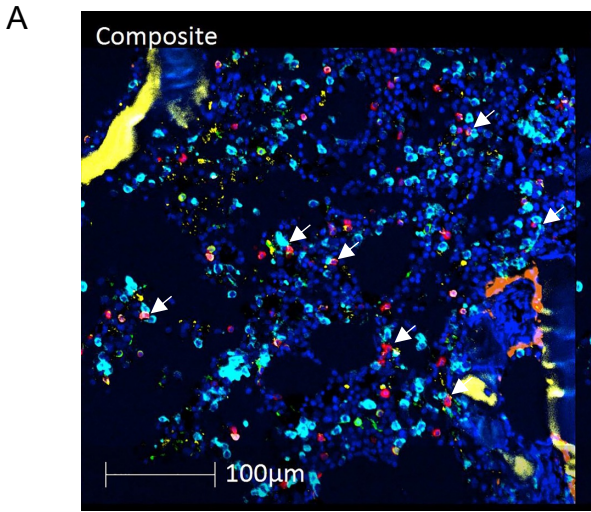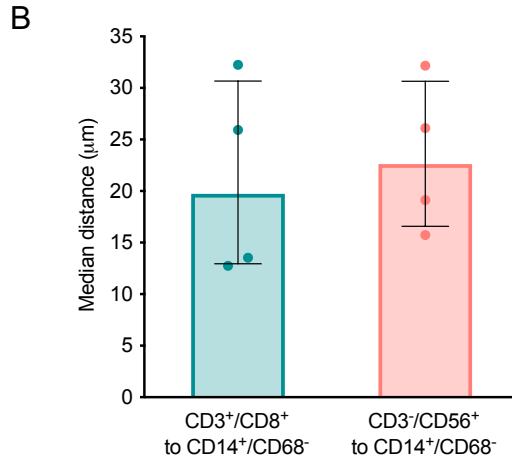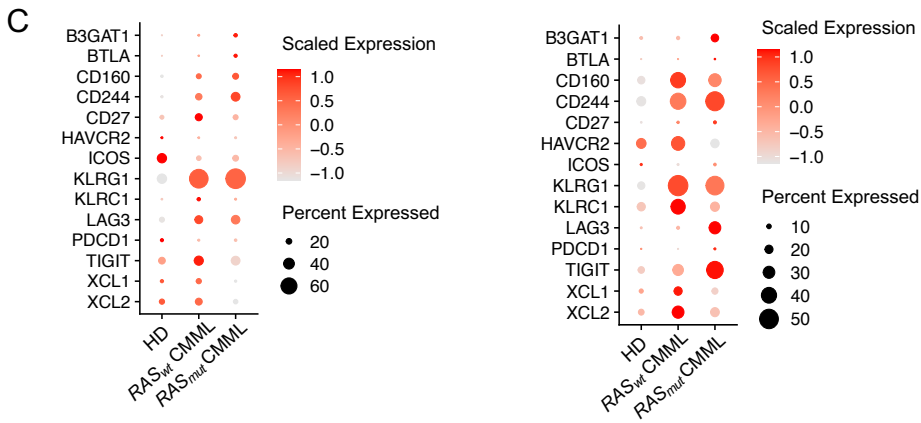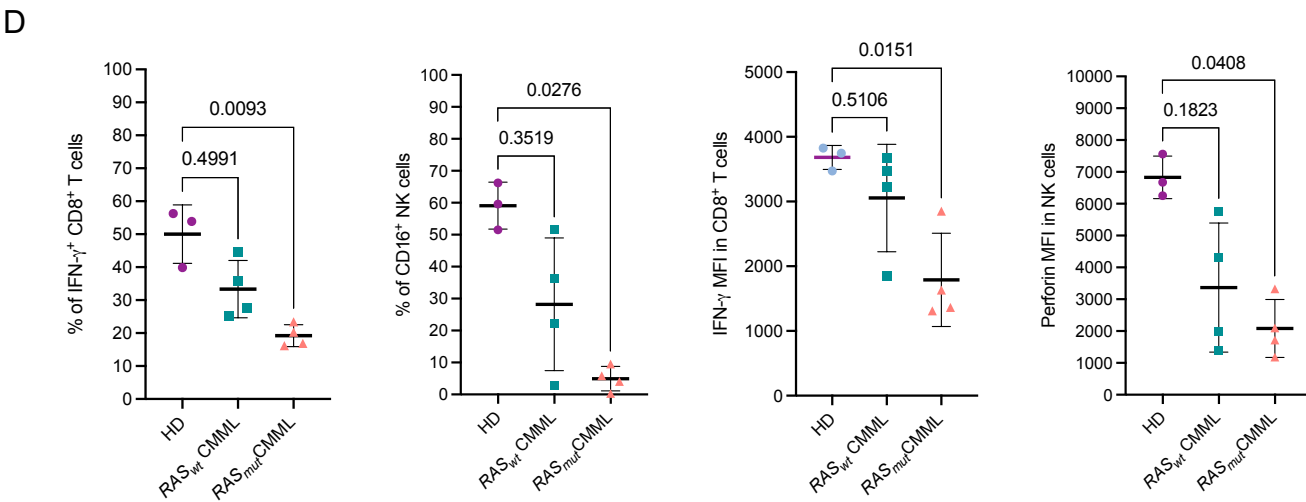

**Figure S5. Immune cells are in a dysfunctional state in CMML and spatially co-localize with monocytic populations. Related to Figure 2.** (A) Representative multiplex immunofluorescence image of a selected BM section area (20× magnification). Cells were stained with antibodies against CD3 (red), CD4 (green), CD8 (magenta), CD14 (cyan), CD56 (orange), and CD68 (yellow). White arrows indicate the interactions between CD14<sup>+</sup> monocytes and CD3<sup>+</sup> T cells. (B) The median distance between CD14<sup>+</sup>/CD68<sup>-</sup> monocytes and CD3<sup>+</sup>/CD8<sup>+</sup> T cells (left) or CD3<sup>-</sup>/CD56<sup>+</sup> NK cells (right) in BM sections obtained from CMML patients (n=4) at the time of diagnosis. (C) Dot plot of exhaustion markers in effector CD8<sup>+</sup> T (left) and NK (right) cells from HDs, and *RAS* pathway wild-type (*RAS<sub>wt</sub>*) or mutant (*RAS<sub>mut</sub>*) CMML. The scaled expression represents z scores across conditions. (D) Frequencies of IFN- $\gamma$ <sup>+</sup> CD8<sup>+</sup> T cells (far left), CD16<sup>+</sup> NK cells (middle left), and mean fluorescent intensity (MFI) of IFN- $\gamma$ <sup>+</sup> in CD8<sup>+</sup> T cells (middle right) or perforin in NK cells (far right) from the BM of HDs (n=3) and *RAS* pathway wild-type (*RAS<sub>wt</sub>*) or mutant (*RAS<sub>mut</sub>*) CMML (n=4). Lines represent means. Statistical significance was calculated using the Kruskal-Wallis test.

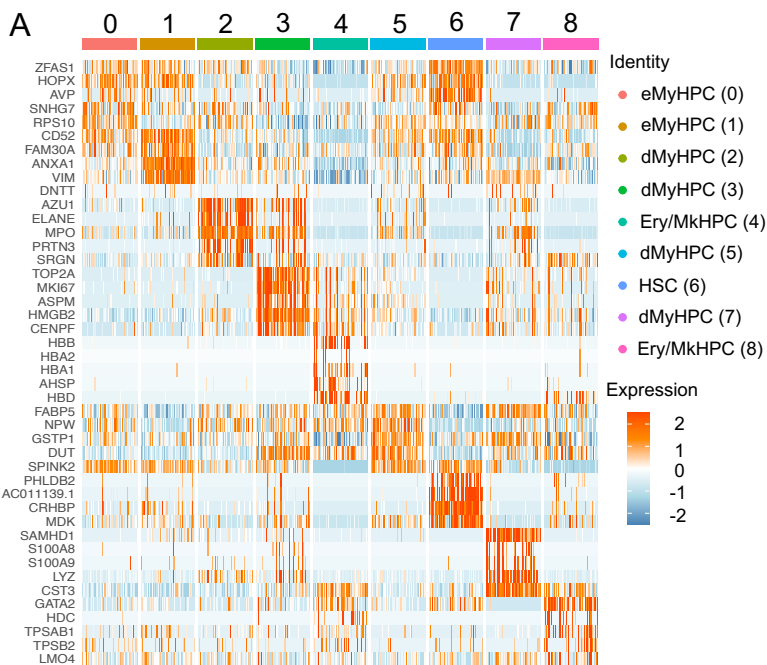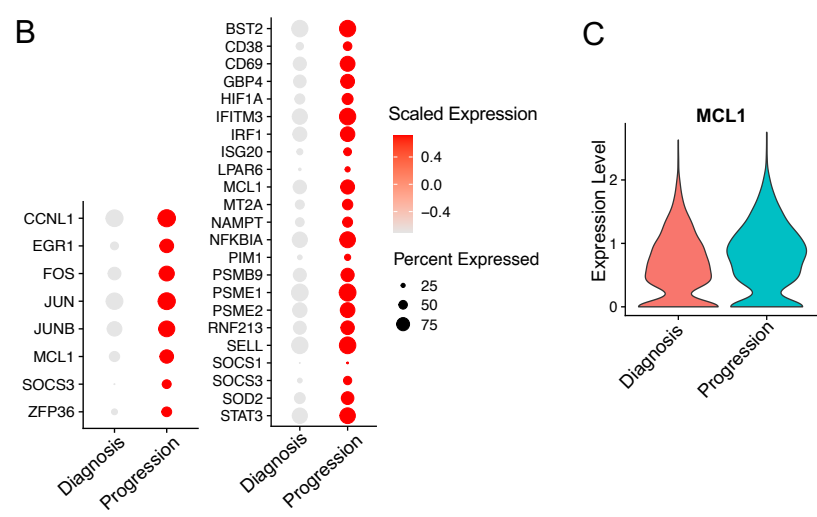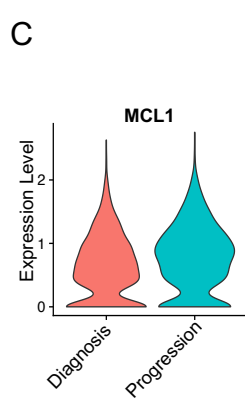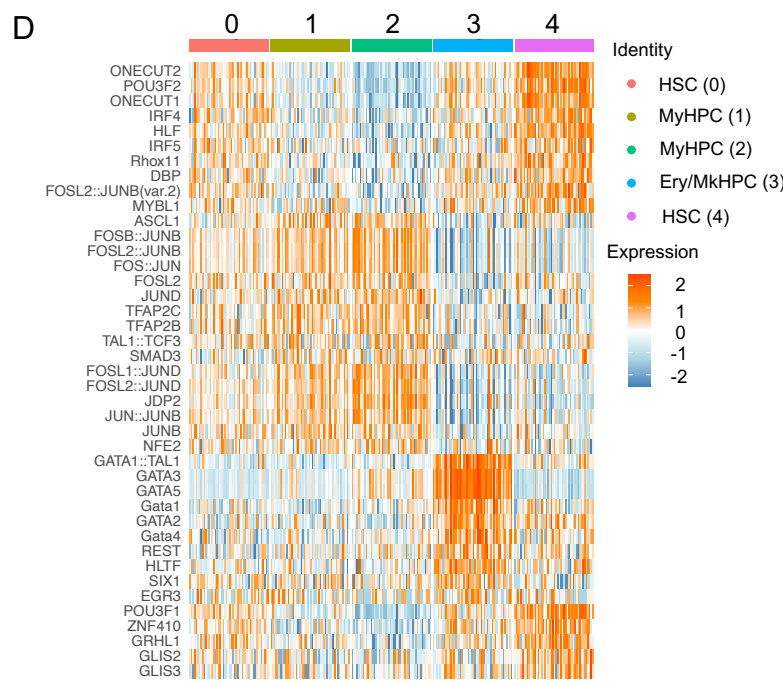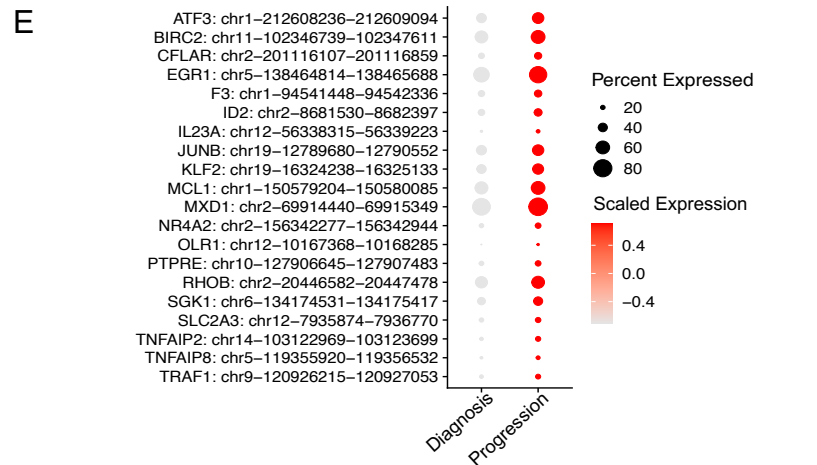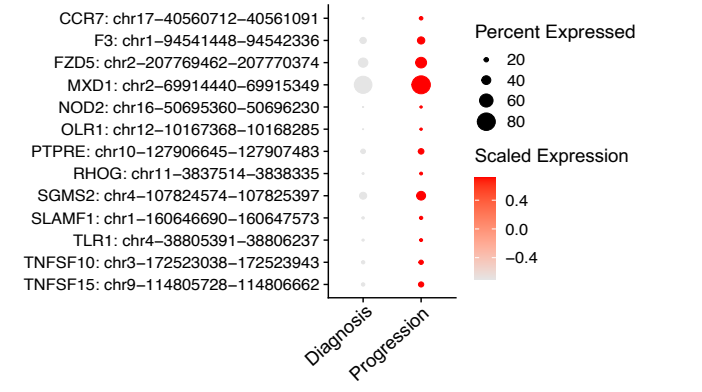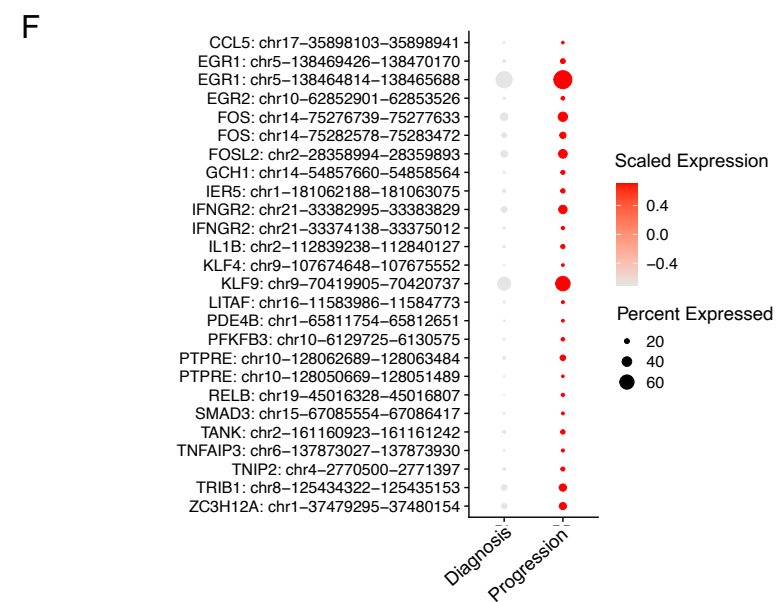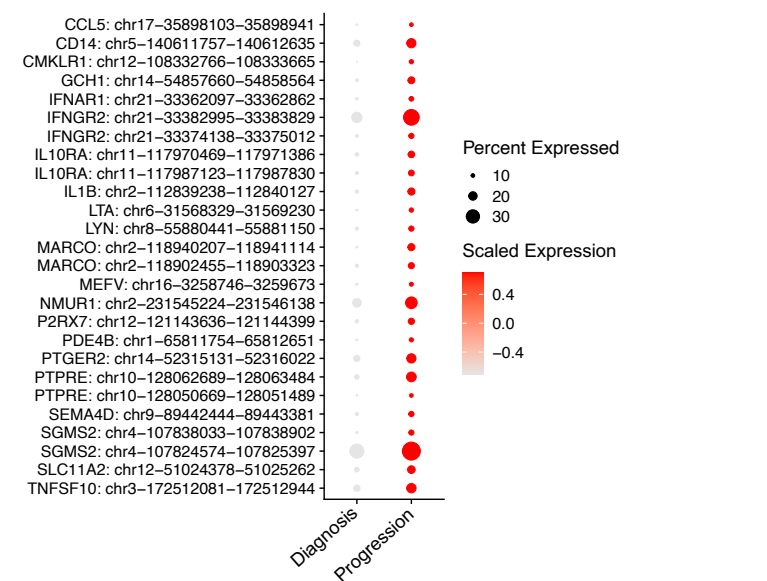

**Figure S6. *RAS* pathway–mutated HSCs undergo epigenetic reprogramming and drive CMML BP after HMA therapy failure.**  
**Related to Figure 3.** (A) Heatmap of the expression levels of the top 5 genes enriched in each of the 9 clusters shown in Fig. 3A. (B) Dot plots of genes belonging to the NF- $\kappa$ B signaling pathway that were significantly upregulated in *RAS* mutant CMML HSCs (left) and eMyHPCs (right) at BP compared with those at diagnosis (adjusted  $P \leq 0.05$ ). The scaled expression represents z scores across conditions. (C) Violin plots of *MCL1* expression levels of *RAS* pathway mutant CMML HSCs at diagnosis and BP (adjusted  $P = 2.55 \times 10^{-4}$ ). (D) Heatmap of the activity of the top 10 TFs enriched in each of the 5 clusters shown in Fig. 3D. (E) Dot plots of genes involved in the NF- $\kappa$ B signaling (top) or inflammatory response (bottom) pathways whose promoters had increased open chromatin peaks in CMML HSCs at BP compared with those at diagnosis ( $P \leq 10^{-4}$ ). The scaled expression represents z scores across conditions. (F) Dot plots of genes involved in the NF- $\kappa$ B signaling (left) or inflammatory response (right) pathways whose distal regulatory elements had increased open chromatin peaks in CMML HSCs at BP compared with those at diagnosis (adjusted  $P \leq 0.05$ ). The scaled expression represents z scores across conditions.

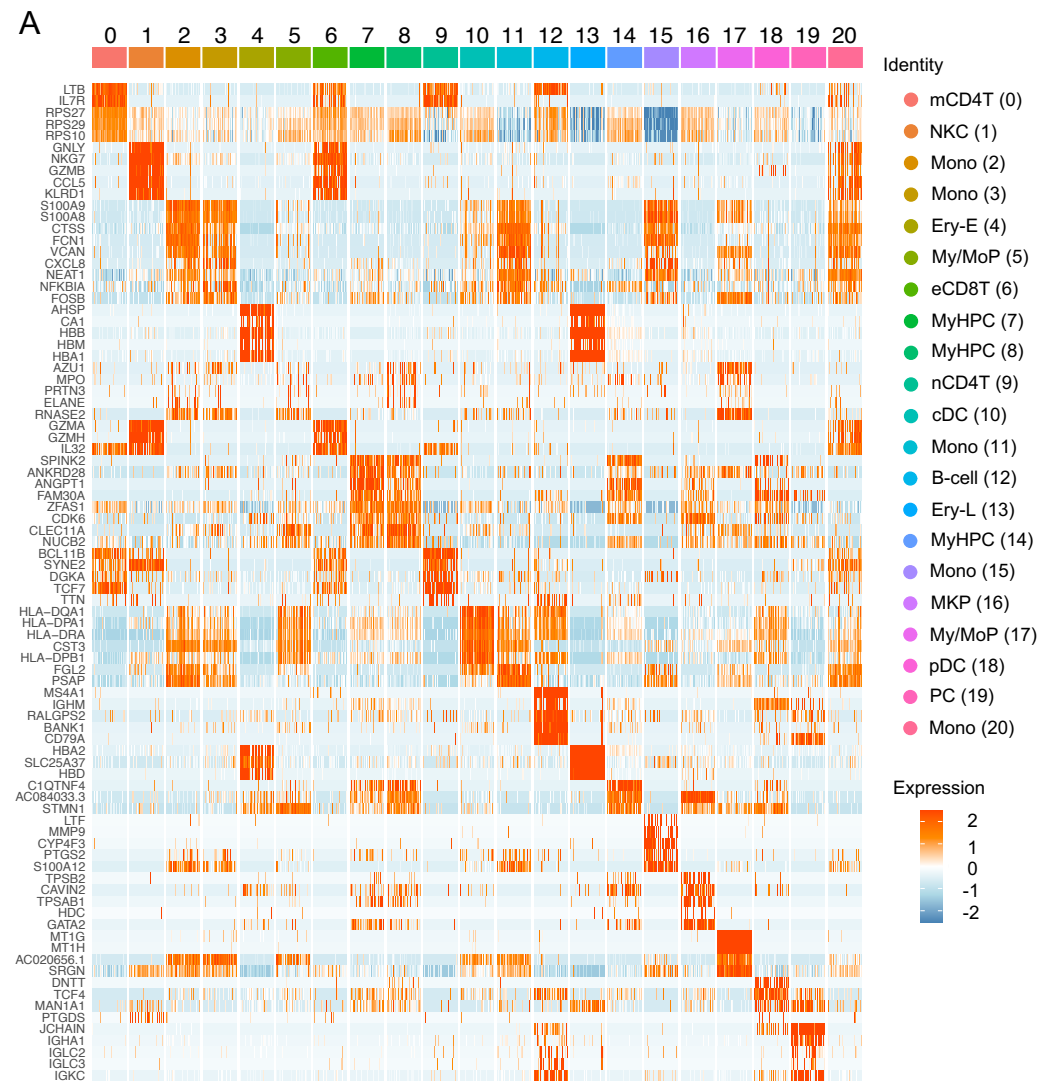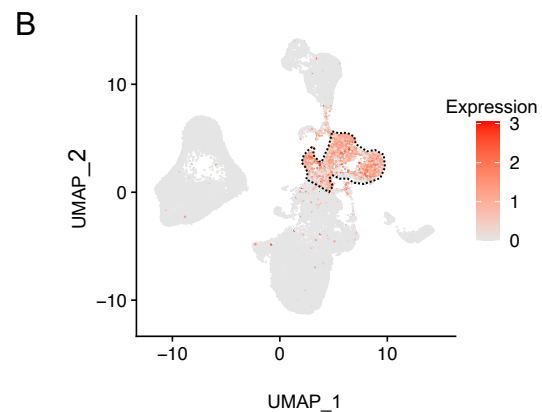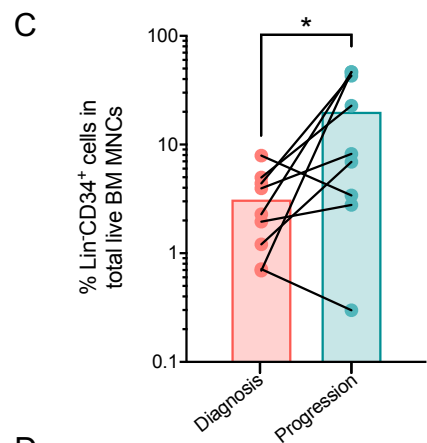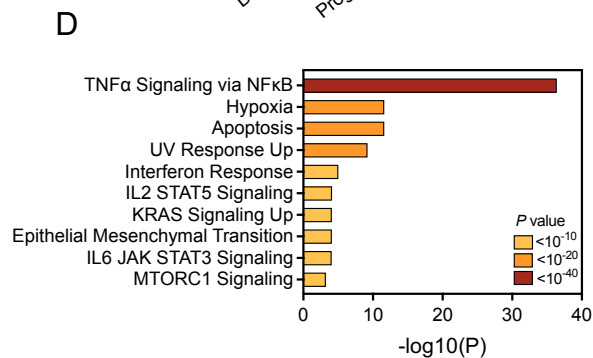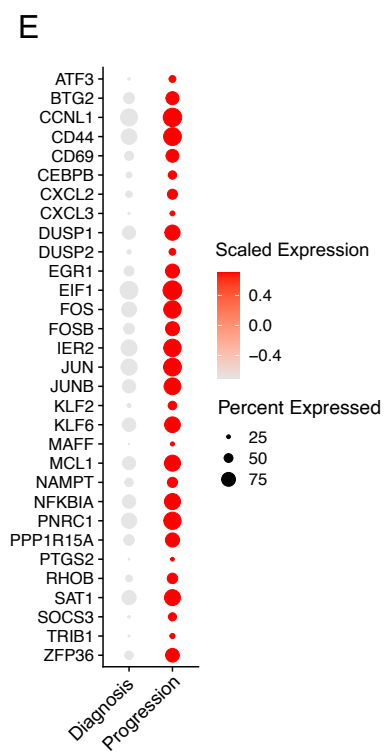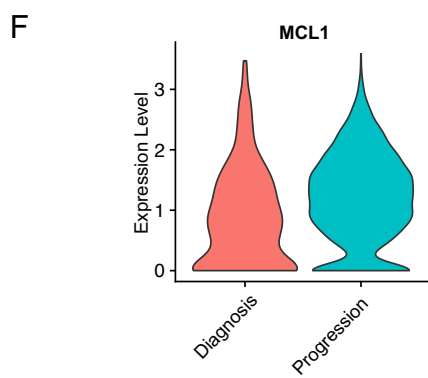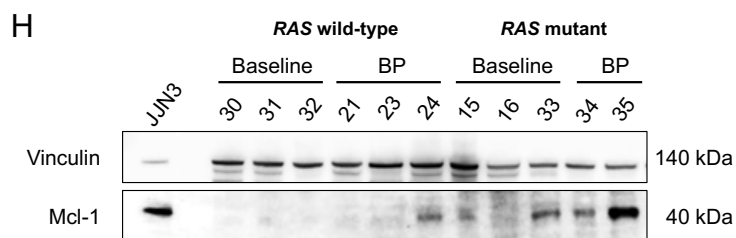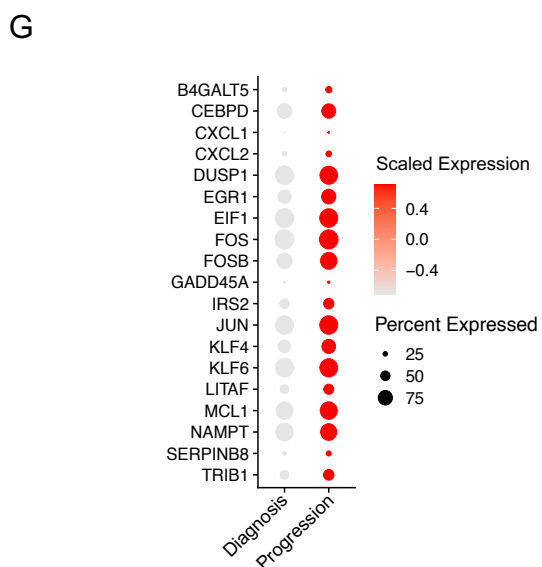

**Figure S7. *RAS* pathway mutated CMML cells upregulate NF- $\kappa$ B survival pathways, including *MCL1*, at BP. Related to Figure 4. (A)** Heatmap of the expression levels of the top 5 genes enriched in each of the 21 clusters shown in Fig. 4A. **(B)** UMAP of the distribution of CD34 expression levels across the clusters, as shown in Fig. 4A. Red shading indicates normalized gene expression. Dashed lines indicate MyHPCs. **(C)** Frequency of Lin<sup>-</sup>CD34<sup>+</sup> cells in MNCs from *RAS* mutant CMML BM samples sequentially collected at diagnosis and BP after HMA therapy failure (n=9). Statistical significance was calculated using a paired two-tailed Student's t-test (\* $P < 0.05$ ). **(D)** Pathway enrichment analysis of the genes that were significantly upregulated in *RAS* mutant MyHPCs at the time of BP compared with those at diagnosis (adjusted  $P \leq 0.05$ ). The top 10 hallmark gene sets are shown. **(E)** Dot plots of genes belonging to the NF- $\kappa$ B signaling pathway that were significantly upregulated in CMML MyHPCs at BP compared with those at diagnosis (adjusted  $P \leq 0.05$ ). The scaled expression represents z scores across conditions. **(F)** Violin plots of *MCL1* expression levels of *RAS* pathway mutant CMML MyHPCs at diagnosis and BP (adjusted  $P = 1.12 \times 10^{-15}$ ). **(G)** Dot plots of genes belonging to the NF- $\kappa$ B signaling pathway that were significantly upregulated in *RAS* pathway mutant CMML monocytes at BP compared with those at diagnosis (adjusted  $P \leq 0.05$ ). The scaled expression represents z scores across conditions. **(H)** Western blot analysis of MCL1 expression levels in CD34<sup>+</sup> BM cells isolated from CMML patients at baseline (*RAS* pathway wild-type, n=3; *RAS* pathway mutant, n=3) or at BP (*RAS* pathway wild-type, n=3; *RAS* pathway mutant, n=2). Vinculin was used as a loading control. JJN3 cells are shown as positive controls. The numbers above each case correspond to the patient's UPN (as detailed in Supplementary Table S3).

A

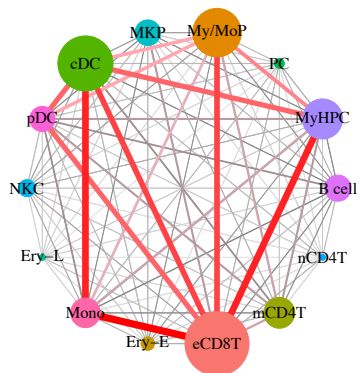

B

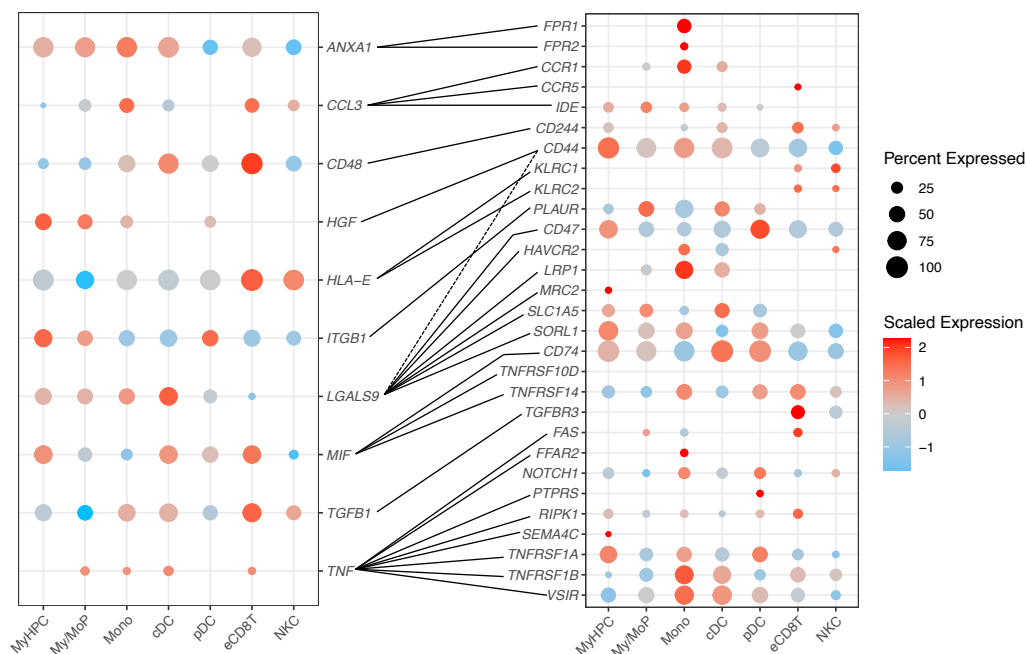

**Figure S8. *RAS* pathway mutated CMML MNCs at BP exacerbate the cellular communication networks observed at the time of diagnosis . Related to Figure 4. (A)** Connectome web analysis of interactions that were significantly increased in BM MNCs from *RAS* pathway mutant CMML patients at BP compared to those at the time of diagnosis. The vertex (i.e., colored cell node) size is proportional to the number of interactions to and from each cell type, and the thickness of each connecting line is proportional to the number of interactions between 2 nodes. **(B)** Dot plots showing the most significant ligand- (left) to-receptor (right) interactions that were gained in MNCs from *RAS* pathway mutant CMML at diagnosis compared with those at BP (adjusted  $P \leq 0.05$ ). Lines represent connections between ligands and their corresponding receptors. Color saturation indicates the level of gene expression. Dot size indicates the percentage of each cell type expressing the gene. The scaled expression represents z scores across conditions.



**A**

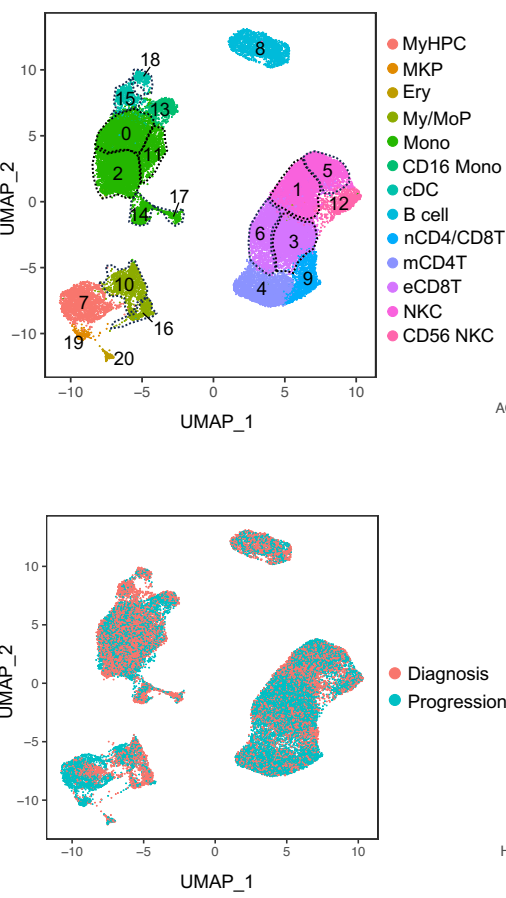

**B**

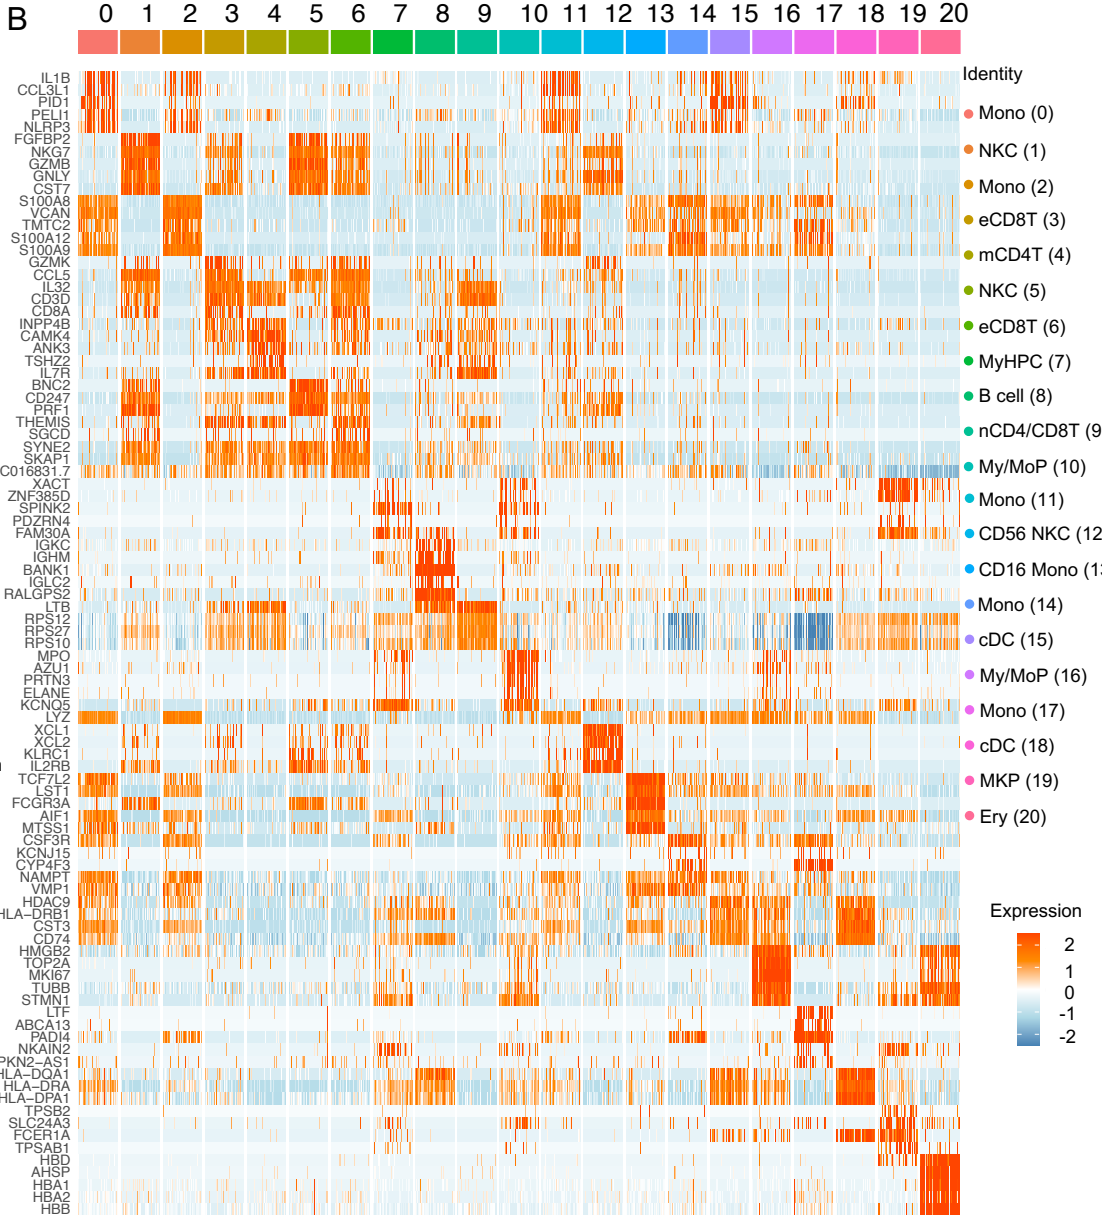

**C**

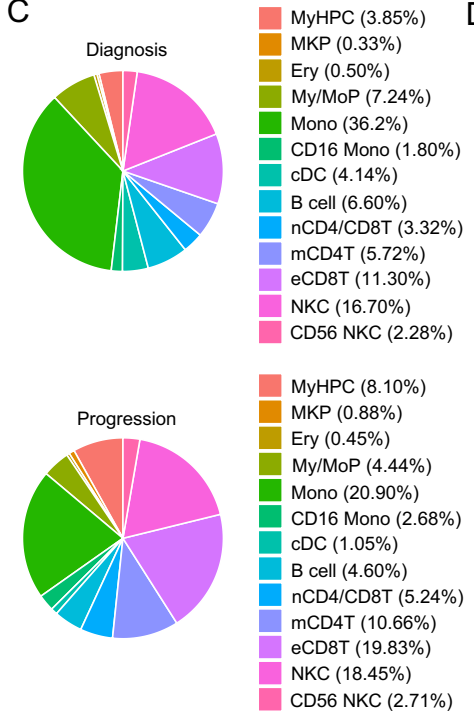

**D**

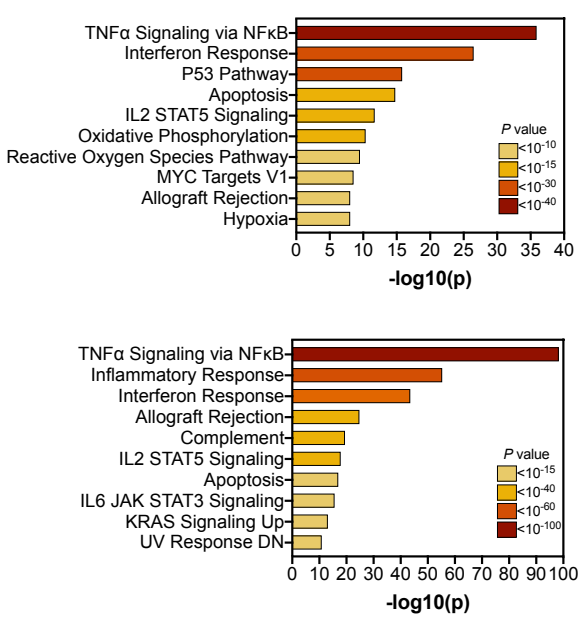

**E**

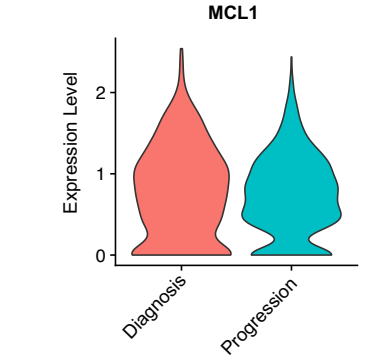

**Figure S9. *RAS* pathway wildtype CMML cells do not upregulate *MCL1*-driven antiapoptotic responses at BP. Related to Figure 4.**

**(A)** UMAP of scRNA-seq data for pooled single MNCs isolated from 3 BM samples isolated from *RAS* pathway wild-type CMML patients at diagnosis (n=16,070) and BP after HMA therapy failure (n=17,747). Each dot represents one cell. Different colors represent the cluster cell type identity (top) or sample origin (bottom). MyHPC, myeloid hematopoietic progenitor cells; MKP, megakaryocytic progenitor cells; Ery, erythroid precursors; My/MoP, myelo/monocytic progenitors; Mono, monocytes; CD16 Mono, CD16<sup>+</sup> non-classical monocytes; cDC, classical dendritic cells; B cell, B lymphocytes; nCD4/CD8T, naïve CD4<sup>+</sup> and CD8<sup>+</sup> T cells; mCD4T, memory CD4<sup>+</sup> T cells; eCD8T, effector CD8<sup>+</sup> T cells; NKC, natural killer cells; CD56 NKC, CD56<sup>+</sup> natural killer cells. Dashed lines indicate single clusters in each cell type population. **(B)** Heatmap of the expression levels of the top 5 genes enriched in each of the 21 clusters shown in Supplementary Fig. S9A. **(C)** Distribution of MNC populations at diagnosis (top) and BP (bottom) among the clusters shown in Fig. S9A. **(D)** Pathway enrichment analysis of the genes that were significantly upregulated in MyHPCs (top) and monocytes (bottom) from *RAS* pathway wild-type CMML at the time of BP compared with those at diagnosis (adjusted  $P \leq 0.05$ ). The top 10 hallmark gene sets are shown. **(E)** Violin plots of *MCL1* expression levels in *RAS* pathway wild-type CMML MyHPCs at diagnosis and BP (adjusted  $P =$  no significant differences).

**A**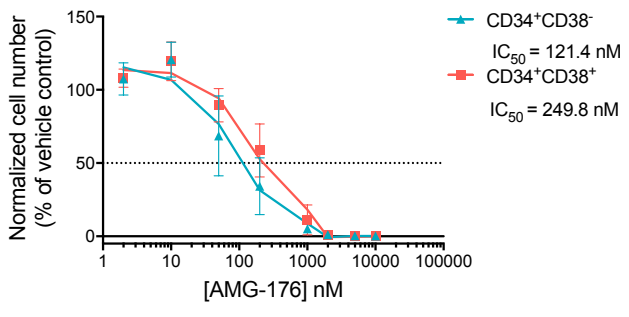**B**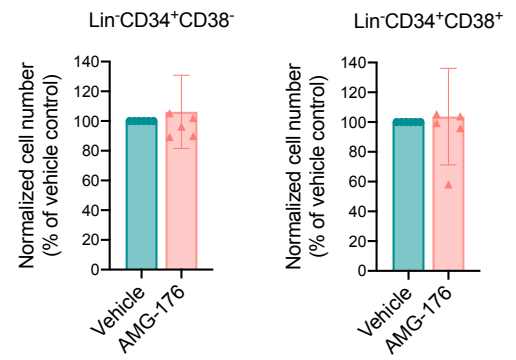**C**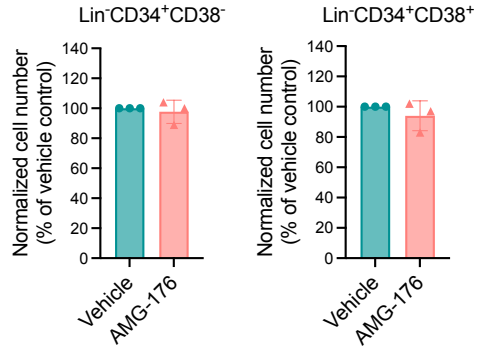**D**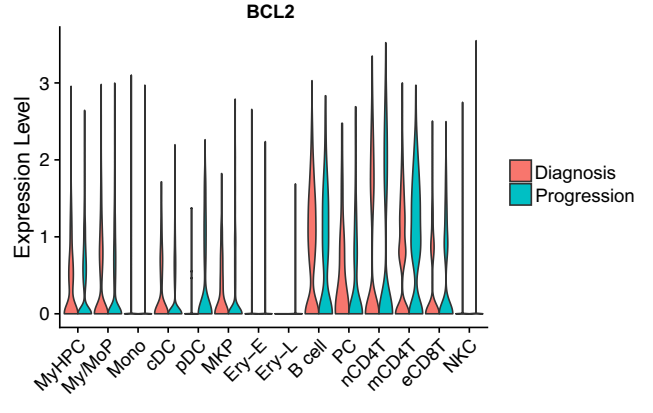**E**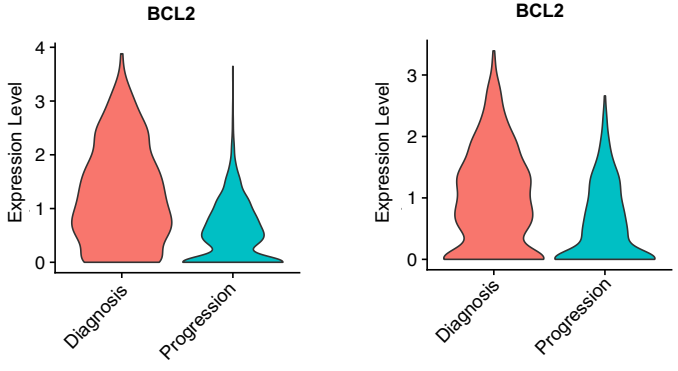**F**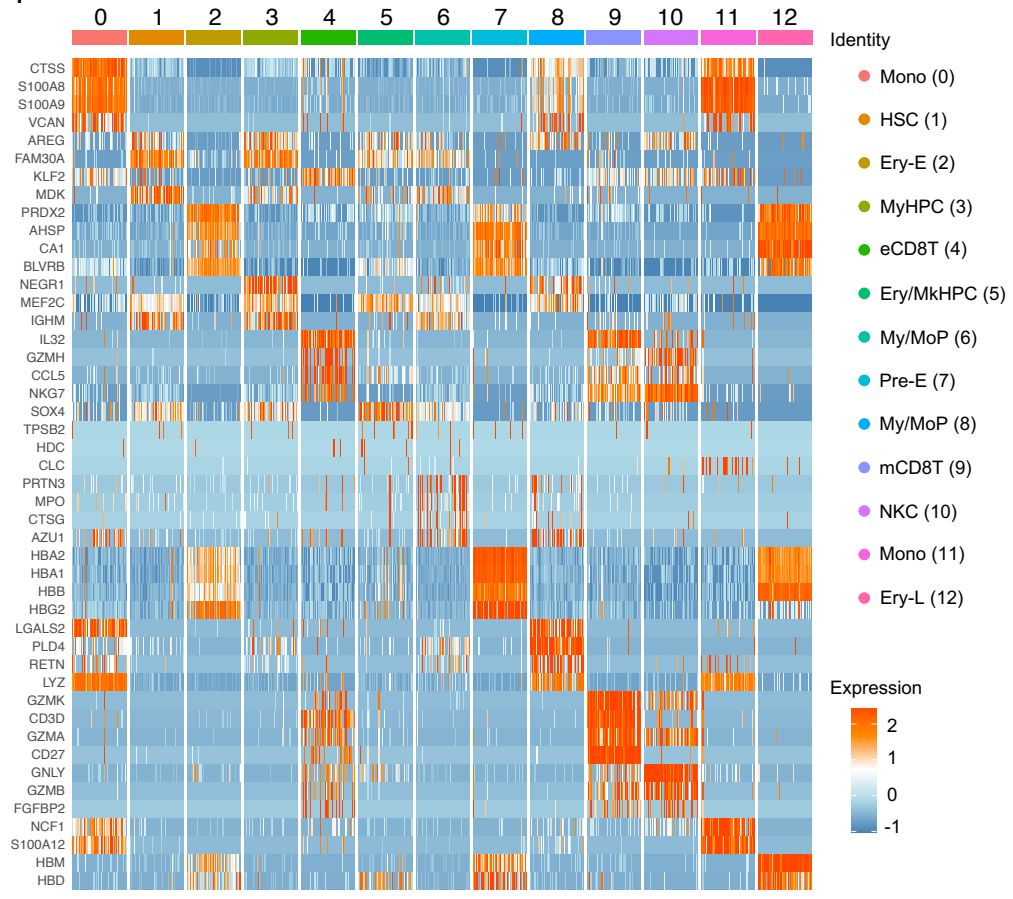**G**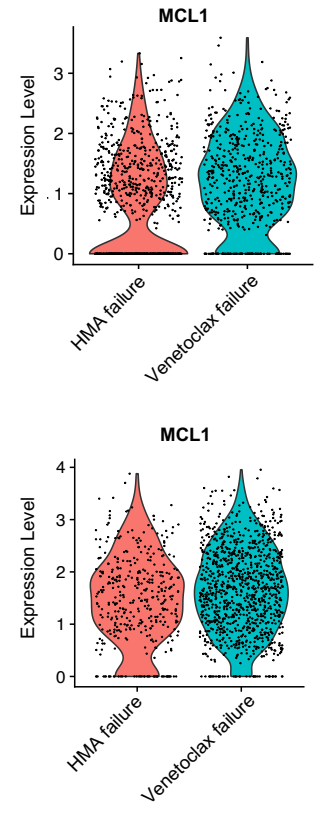

**Figure S10. *RAS* pathway mutated CMML cells, but not *RAS* pathway wildtype CMML cells, rely on *MCL1* overexpression to maintain their survival at BP. Related to Figure 4. (A)** Number of live cultured Lin<sup>-</sup>CD34<sup>+</sup>CD38<sup>-</sup> and Lin<sup>-</sup>CD34<sup>+</sup>CD38<sup>+</sup> cells from HD BM samples (n=2) after 48 hours of treatment with AMG-176. Lines represent means  $\pm$  SEMs. **(B)** Number of live Lin<sup>-</sup>CD34<sup>+</sup>CD38<sup>-</sup> HSCs and Lin<sup>-</sup>CD34<sup>+</sup>CD38<sup>+</sup> MyHPCs from *RAS* pathway mutant CMML patients at diagnosis and after treatment with vehicle or AMG-176 (n=6, 20nM) for 48 hours. Lines represent means  $\pm$  SDs. A paired two-tailed Student t-test revealed no significant differences. **(C)** Number of live Lin<sup>-</sup>CD34<sup>+</sup>CD38<sup>-</sup> HSCs and Lin<sup>-</sup>CD34<sup>+</sup>CD38<sup>+</sup> MyHPCs from *RAS* pathway wild-type CMML patients at BP after HMA failure and after treatment with vehicle or AMG-176 (n=4, 20nM) for 48 hours. Lines represent means  $\pm$  SDs. A paired two-tailed Student t-test revealed no significant differences. **(D)** Violin plots of *BCL2* expression levels across each *RAS* pathway mutant CMML MNC population at diagnosis compared with those at BP (no significant difference was detected). **(E)** Violin plots of *BCL2* expression levels in MyHPCs (left) and My/MoPs (right) from *RAS* pathway wild-type CMML at diagnosis compared with those at BP (adjusted  $P = 5.45 \times 10^{-54}$  and  $1.13 \times 10^{-24}$ , respectively). **(F)** Heatmap of the expression levels of the top 5 genes enriched in each of the 13 clusters shown in Fig. 4E. **(G)** Violin plots of *MCL1* expression levels in *RAS* pathway mutant MyHPCs (top) and My/MoPs (bottom) at the time of BP after HMA therapy failure compared with those at venetoclax failure (adjusted  $P = 1.12 \times 10^{-15}$  and no significant difference, respectively).
